# Supplementary material for: Graphitic carbon nitride (g-C3N4) as a sustainable heterogeneous photocatalyst for metal free and oxygen-tolerant photo-atom transfer radical polymerization (photo-ATRP)
Source: Royal Society of Chemistry journal article supplement (doi:10.1039/d1gc03604a), 2021-01-01
Supplement: d1gc03604a1.pdf [file d1gc03604a1.pdf]

## Supplementary Information

### **Graphitic Carbon Nitride (g-C<sub>3</sub>N<sub>4</sub>) as Sustainable Heterogeneous Photocatalyst for Metal Free and Oxygen-Tolerant Photo Atom Transfer Radical Polymerization (Photo-ATRP)**

Lin Zhou, Ziqi Zhang, Mengmeng Li, Qi Wang, Jiani Gao, Kebin Li, Lin Lei\*

Key Laboratory of Synthetic and Natural Functional Molecular Chemistry of the Ministry of Education, College of Chemistry and Materials Science, Northwest University, Xi'an, 710127, P. R. China.

Corresponding Author: [leil@nwu.edu.cn](mailto:leil@nwu.edu.cn)

## Experimental section

**Materials:** Methyl methacrylate (MMA, 99%, Aladdin), benzyl methacrylate (BzMA, 98%, Aladdin), tert-butyl acrylate (tBA, 99%, Aladdin) and 2-(Dimethylamino) ethyl methacrylate (DMAEMA, 99%, Aladdin) were passed through an alumina column to remove the inhibitor. Ethyl  $\alpha$ -bromoisobutyrate (EBiB, 98%, Aladdin) and ethyl  $\alpha$ -bromophenylacetate (EBP, 95%, Heowns) were used directly. Tetrahydrofuran (THF, 99%), dimethyl sulfoxide (DMSO,  $\geq 99.5\%$ ), N,N-dimethylformamide (DMF,  $\geq 99.5\%$ ), toluene ( $\geq 99.5\%$ ), methanol ( $\geq 99.9\%$ ) and others were purchased from Aladdin (Shanghai, China).

The blue light source (460 nm) used for all experiments was commercial illumination lamps, with 12 W ( $\sim 10 \text{ mW cm}^{-2}$ ) and 5 W ( $\sim 4 \text{ mW cm}^{-2}$ ) bulbs respectively.

**Characterization:** UV-vis spectra were recorded on a UV1600 which was purchased from Shanghai Jinghua Technology Instrument Co., Ltd. Regarding gel permeation chromatography (GPC), the THF-GPC analysis was performed on an Agilent GPC-1260 liquid chromatography including a PL 1110-6100 mixed gel column ( $10 \mu\text{m}$ ;  $300 \times 7.5 \text{ mm}$ ) and a PL 1110-6540 column ( $5 \mu\text{m}$ ;  $300 \times 7.5 \text{ mm}$ ). The flow rate was  $1.0 \text{ mL min}^{-1}$  ( $35^\circ\text{C}$ ). The column system was calibrated with standard polymethyl methacrylate (PMMA) for THF-GPC systems.  $^1\text{H}$  NMR spectra of products were examined in  $\text{CDCl}_3$  at  $30^\circ\text{C}$  and tetramethylsilane was used as the internal standard. The morphologies of sample were characterized on a Hitachi SU-8010 SEM coupled with an energy-dispersive X-ray (EDX) spectrometer. Powder X-ray diffraction (PXRD, Bruker D8, Germany) and X-ray photoelectron spectra (XPS, ULVAC-PHI, Japan) were used for elemental composition and structure characterization. Fourier transform infrared spectroscopy (FT-IR) were measured with an EQUINOX55 spectrometer (Bruker, Germany) using KBr pellets in the range of  $500\text{--}4000 \text{ cm}^{-1}$ . The nitrogen adsorption-desorption analysis was carried out at  $77 \text{ K}$  on Micromeritics TriStar II 3020 apparatus and the surface areas were calculated using the Brunauer-Emmett-Teller (BET) equation. Room-temperature photoluminescence spectra (PL) were detected on an Edinburgh instruments Ltd. FLSP920 fluorescence spectrometer.

**Electrochemical measurements:** Cyclic voltammetry (CV) experiments were carried out with a CHI650E electrochemical workstation (Shanghai Chenhua Instrument Plant, China). Glassy carbon disk (diameter  $3 \text{ mm}$ ) was used as the working electrode, a platinum column as the counter electrode, and Ag/AgCl pillar as the reference electrode. Before the electrode is used, firstly polished it with alumina powder (purchased by Shanghai Chenhua) on the Microcloth polishing flannel.  $1 \text{ mg g-C}_3\text{N}_4\text{-1}$ ,  $\text{g-C}_3\text{N}_4\text{-2}$ ,  $\text{g-C}_3\text{N}_4\text{-3}$ ,  $\text{g-C}_3\text{N}_4\text{-4}$  was dispersed in a mixed solution of  $100 \mu\text{L}$  water,  $100 \mu\text{L}$  ethanol and  $20 \mu\text{L}$  Nafion, respectively. After ultrasonication for 30 minutes, take an appropriate amount and drop it on the working electrode until dry. The CV scan was performed in a  $5 \text{ mM K}_3[\text{Fe}(\text{CN})_6]/0.1 \text{ M KCl}$  solution (scan rate:  $50 \text{ mV s}^{-1}$ ) and also  $0.5 \text{ M H}_2\text{SO}_4$  solution (scan rate:  $100 \text{ mV s}^{-1}$ ) (Purge the electrolyte with argon for 5 minutes before measurement).

**General procedure for the preparation of g-C<sub>3</sub>N<sub>4</sub>:** Four kinds of g-C<sub>3</sub>N<sub>4</sub> were synthesized by thermal treatment of different nitrogen-rich precursors.<sup>1-3</sup> The general synthetic procedure is briefly described as follows. The melamine, thiourea and urea as precursors were ground to powder and placed in closed crucible respectively, and then put into a muffle furnace. The temperature was raised to 550 °C for 4 hours at a heating rate of 5 °C min<sup>-1</sup> in an air atmosphere. Naturally cooled to room temperature to obtain three product samples, named g-C<sub>3</sub>N<sub>4</sub>-1, g-C<sub>3</sub>N<sub>4</sub>-2 and g-C<sub>3</sub>N<sub>4</sub>-3. Otherwise, urea was used as the precursor and calcined twice in muffle furnace with the same procedure. The yellow g-C<sub>3</sub>N<sub>4</sub> powder obtained by the two-step calcination was named g-C<sub>3</sub>N<sub>4</sub>-4.

**General procedure for ATRP using g-C<sub>3</sub>N<sub>4</sub>:** MMA (1.5 g, 14.98 mmol, 200 equiv), EBP (18 mg, 0.075 mmol, 1 equiv), g-C<sub>3</sub>N<sub>4</sub> (30 mg), and THF (1.5 g, 20.8 mmol) were added in a magnetically stirred, argon-filled schlenk tube (10 mL) and exposure to blue LEDs. At a specific time in between, a small volume of solution was removed from the flask in an argon atmosphere, and then the *M<sub>n</sub>* and PDI of the polymer were analyzed by GPC. After the reaction finished, the polymer solution was diluted with THF, and the polymer was re-precipitated in cold methanol twice for purification. The collected polymer is dried and weighed to calculate the conversion.

**General procedure for the synthesis of the macro-initiator (PMMA-Br):** MMA (1.5 g, 14.98 mmol, 200 equiv), EBP (18 mg, 0.075 mmol, 1 equiv), g-C<sub>3</sub>N<sub>4</sub>-4 (30 mg), and THF (1.5 g, 20.8 mmol) were added in a magnetically stirred and argon-filled schlenk tube (10 mL) and reacted according to the above general polymerization procedure for 5 hours. Then, the polymer was dissolved in a small amount of THF and dropped into 30 mL of methanol to remove unreacted monomers and initiator. The product was dried in a vacuum oven to obtain a white powder. GPC was used to analyze the product to determine *M<sub>n</sub>* and PDI.

**General Procedure of chain extension experiment:** In chain-extension polymerization of MMA, MMA (0.25 g, 2.5 mmol, 200 equiv), PMMA-Br (74 mg, 0.012 mmol, 1 equiv), g-C<sub>3</sub>N<sub>4</sub>-4 (5 mg), and THF (0.25 g, 3.47 mmol) to a schlenk tube. The reaction was irradiated with blue light for 5 hours and then precipitated in methanol to separate the block polymer. In chain-extension polymerization of DMAEMA, DMAEMA (0.25 g, 1.5 mmol, 100 equiv), PMMA-Br (95 mg, 0.015 mmol, 1 equiv), g-C<sub>3</sub>N<sub>4</sub>-4 (5 mg), and THF (0.25 g, 3.47 mmol) to a schlenk tube. The reaction was irradiated with blue light irradiation for 5 h before the block polymer was purified as mentioned above. In chain-extension polymerization of BzMA, BzMA (0.25 g, 1.4 mmol, 100 equiv), PMMA-Br (85 mg, 0.014 mmol, 1 equiv), g-C<sub>3</sub>N<sub>4</sub>-4 (5 mg), and THF (0.25 g, 3.47 mmol) to a schlenk tube. The reaction was irradiated with blue light for 9 hours to obtain its block polymer. In chain-extension polymerization of *t*BA, *t*BA (0.25 g, 1.9 mmol, 100 equiv), PMMA-Br (117 mg, 0.019 mmol, 1 equiv), g-C<sub>3</sub>N<sub>4</sub>-4 (5 mg), and THF (0.25 g, 3.47 mmol) to a schlenk tube. The mixed solution was reacted under blue light for 7 hours. The block polymer is separated according to the general polymerization procedure described above.

**General process of the recatalytic cycle:** MMA (2.5 g, 24.98 mmol, 200 equiv), EBP (30 mg, 0.123 mmol, 1 equiv), g-C<sub>3</sub>N<sub>4</sub> (50 mg), and THF (2.5 g, 34.7 mmol) were added in a

magnetically stirred, argon-filled schlenk tube (10 mL) and exposure to blue LEDs. As g-C<sub>3</sub>N<sub>4</sub> is insoluble in the polymerization system, after the reaction finished, it is separated from the final polymer by a high-speed centrifuge (Bioridge, shanghai) for recycling. The resulting mixture was dissolved in THF, then centrifuged at a rate of 8000 r min<sup>-1</sup> for 15 min to obtain g-C<sub>3</sub>N<sub>4</sub> powders and supernatant. G-C<sub>3</sub>N<sub>4</sub> powders were separated and dried. The supernatant was precipitated in methanol and purified to analyze by GPC. The dried g-C<sub>3</sub>N<sub>4</sub> and new MMA, EBP and THF were added to the reaction flask, degassed and polymerized under blue LEDs again.

#### Monomers

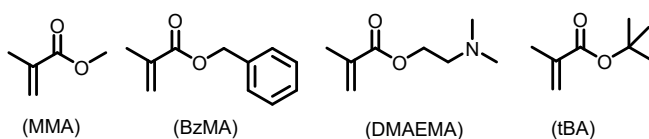

#### Catalysts

##### Alkyl bromines

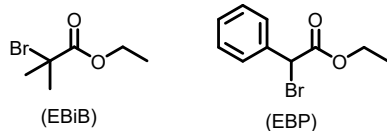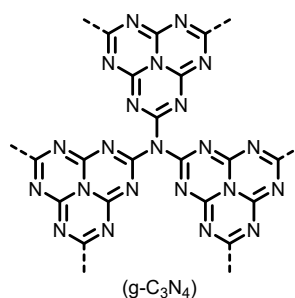

**Fig S1.** The chemical structures of the monomer, initiators and catalyst used in this work.

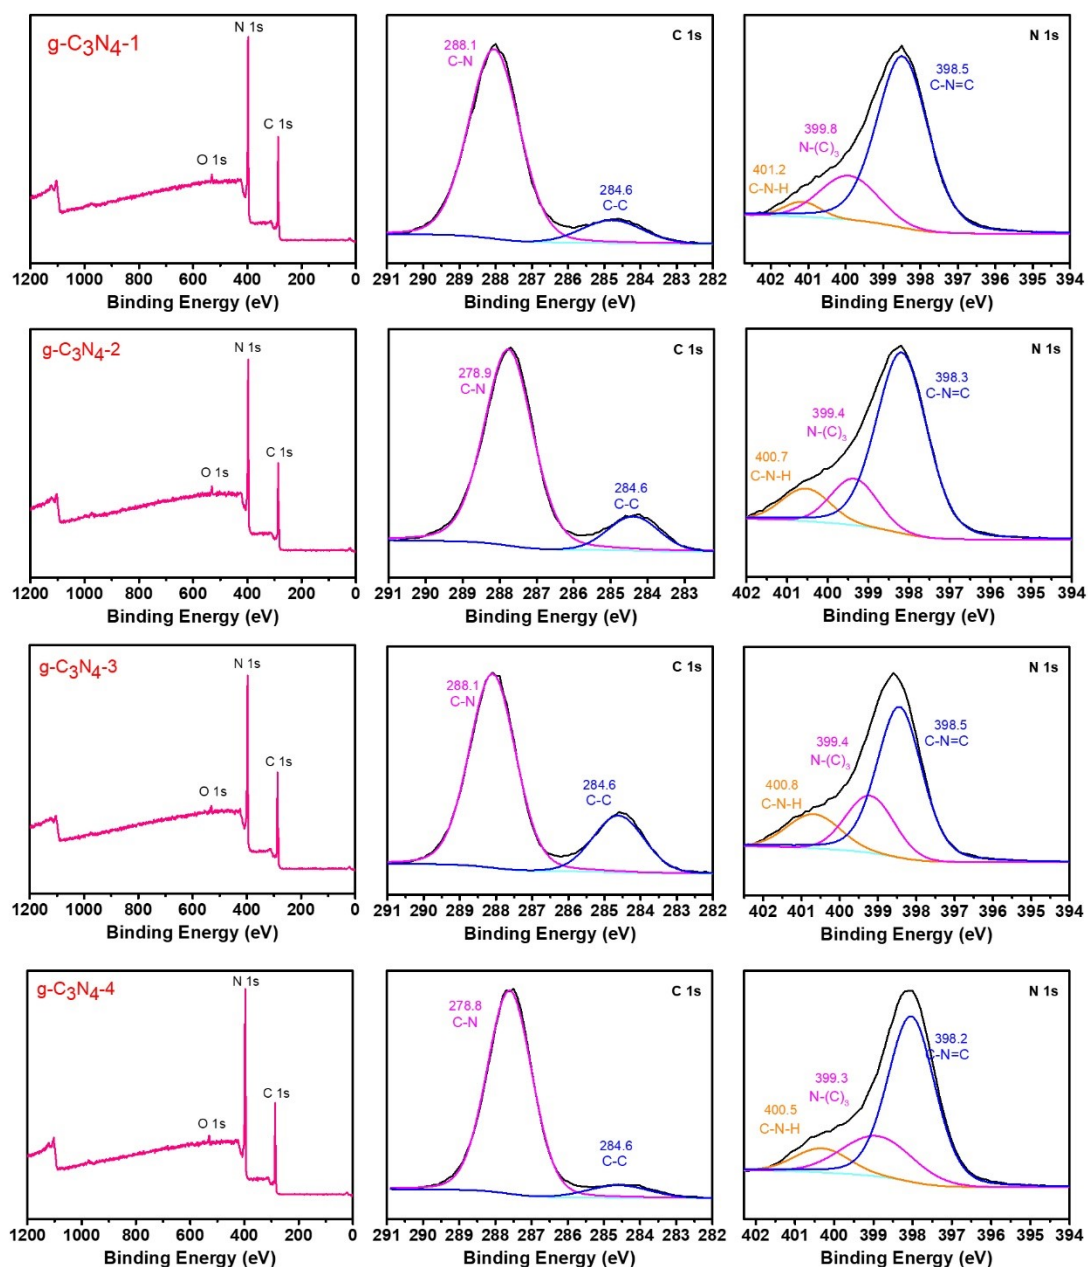

**Fig S2.** XPS spectra of g-C<sub>3</sub>N<sub>4</sub>-1, g-C<sub>3</sub>N<sub>4</sub>-2, g-C<sub>3</sub>N<sub>4</sub>-3 and g-C<sub>3</sub>N<sub>4</sub>-4.

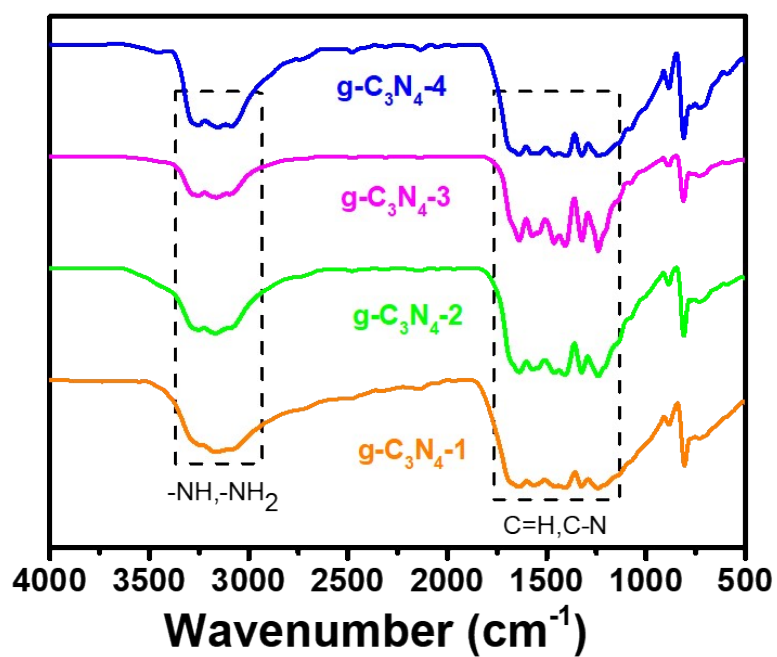

**Fig S3.** FT-IR spectra of g-C<sub>3</sub>N<sub>4</sub>-1, g-C<sub>3</sub>N<sub>4</sub>-2, g-C<sub>3</sub>N<sub>4</sub>-3 and g-C<sub>3</sub>N<sub>4</sub>-4.

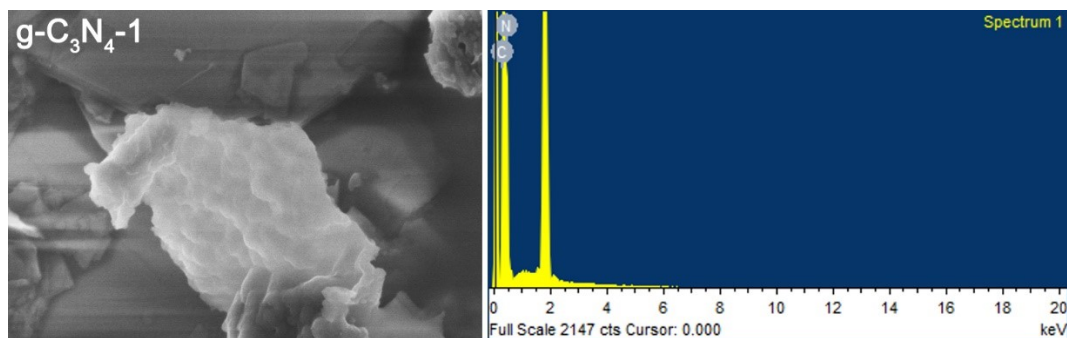

| Element | Weight% | Atomic% |
|---------|---------|---------|
| C K     | 27.97   | 31.17   |
| N K     | 72.03   | 68.83   |

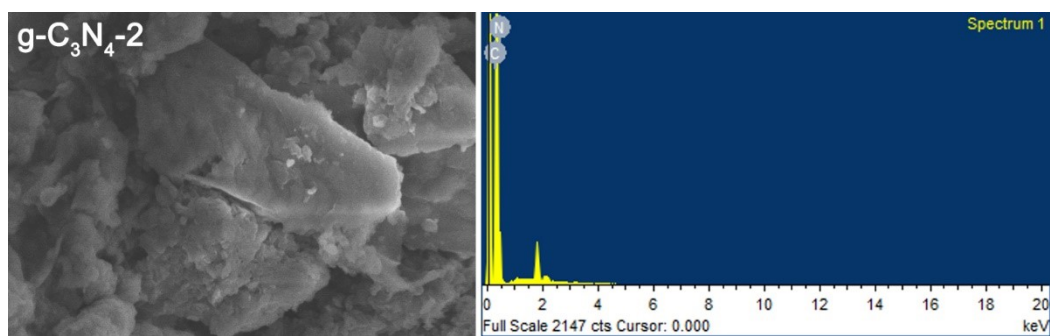

| Element | Weight% | Atomic% |
|---------|---------|---------|
| C K     | 53.32   | 58.44   |
| N K     | 40.36   | 37.93   |
| O K     | 1.86    | 1.53    |
| Si K    | 4.46    | 2.09    |

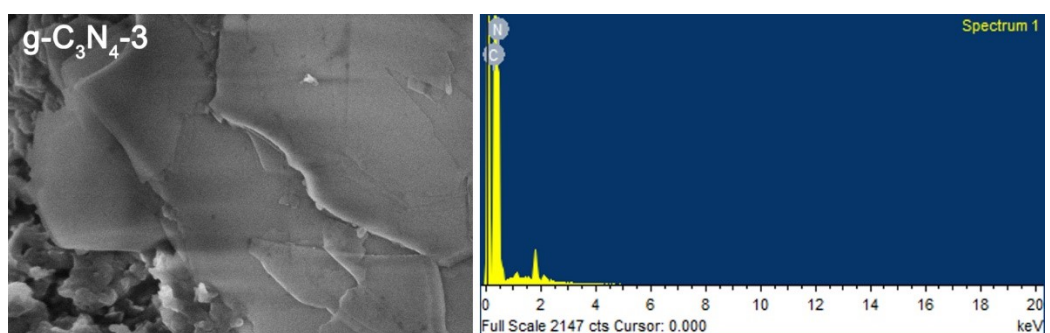

| Element | Weight% | Atomic% |
|---------|---------|---------|
| C K     | 37.22   | 41.41   |
| N K     | 57.22   | 54.60   |
| O K     | 3.68    | 3.07    |

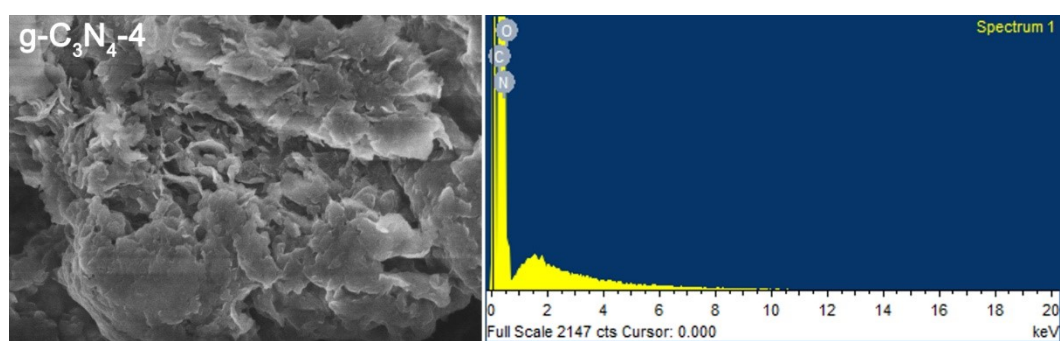

| Element | Weight% | Atomic% |
|---------|---------|---------|
| C K     | 48.97   | 53.03   |
| N K     | 47.54   | 44.14   |
| O K     | 3.49    | 2.83    |

**Fig S4.** SEM and EDX spectra of g-C<sub>3</sub>N<sub>4</sub>-1, g-C<sub>3</sub>N<sub>4</sub>-2, g-C<sub>3</sub>N<sub>4</sub>-3 and g-C<sub>3</sub>N<sub>4</sub>-4.

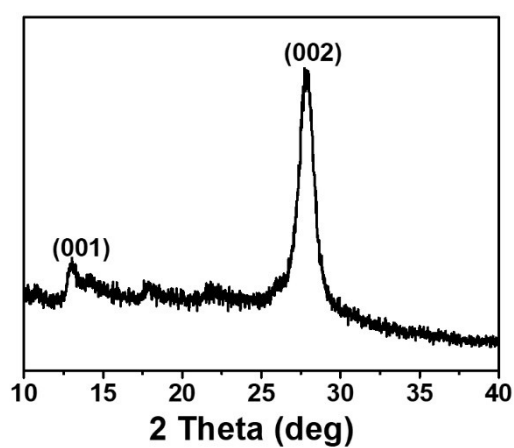

**Fig S5.** PXRD spectrum of g-C<sub>3</sub>N<sub>4</sub>-4.

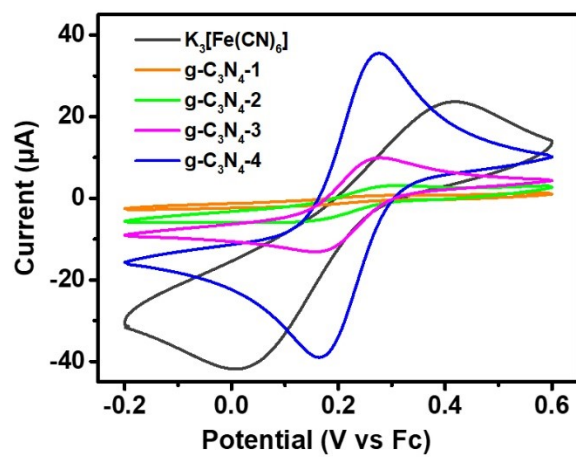

**Fig S6.** CV curves of  $K_3[Fe(CN)_6]$ ,  $g-C_3N_4-1$ ,  $g-C_3N_4-2$ ,  $g-C_3N_4-3$  and  $g-C_3N_4-4$  in 5mM  $K_3[Fe(CN)_6]$ /0.1M KCl solution, scan rate: 50 mV/s<sup>-1</sup>.

Potential (V vs Fc)

**Fig S7.** CV curves of  $g-C_3N_4-1$ ,  $g-C_3N_4-2$ ,  $g-C_3N_4-3$  and  $g-C_3N_4-4$  in  $H_2SO_4$  solution (0.5 M), scan rate: 100 mV/s<sup>-1</sup>.

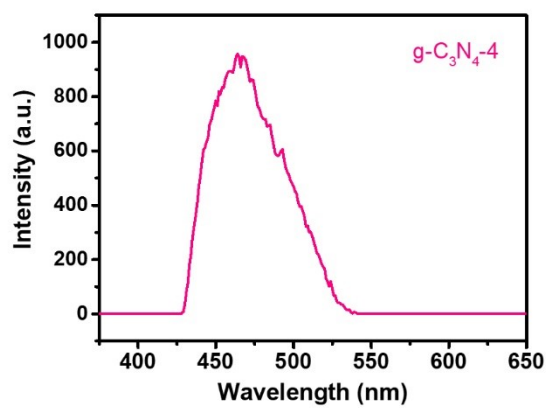

**Fig S8.** Room-temperature steady-state PL spectrum of  $g\text{-C}_3\text{N}_4\text{-4}$ .

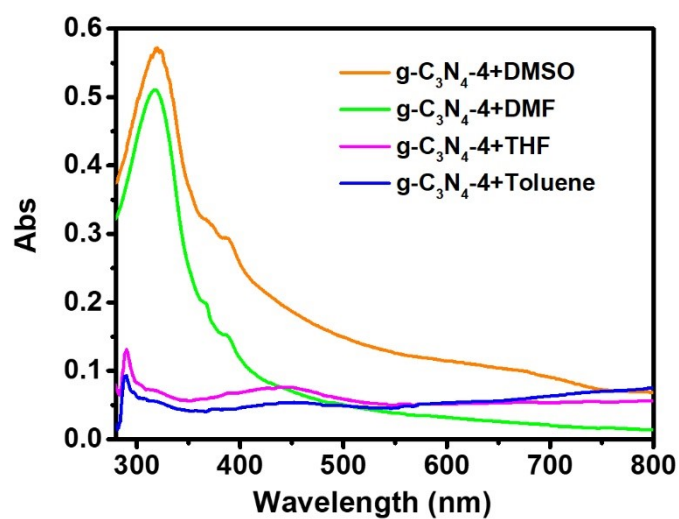

**Fig S9.** UV-vis spectra of  $g\text{-C}_3\text{N}_4\text{-4}$  in different solvents ( $0.05 \text{ mg mL}^{-1}$ ).

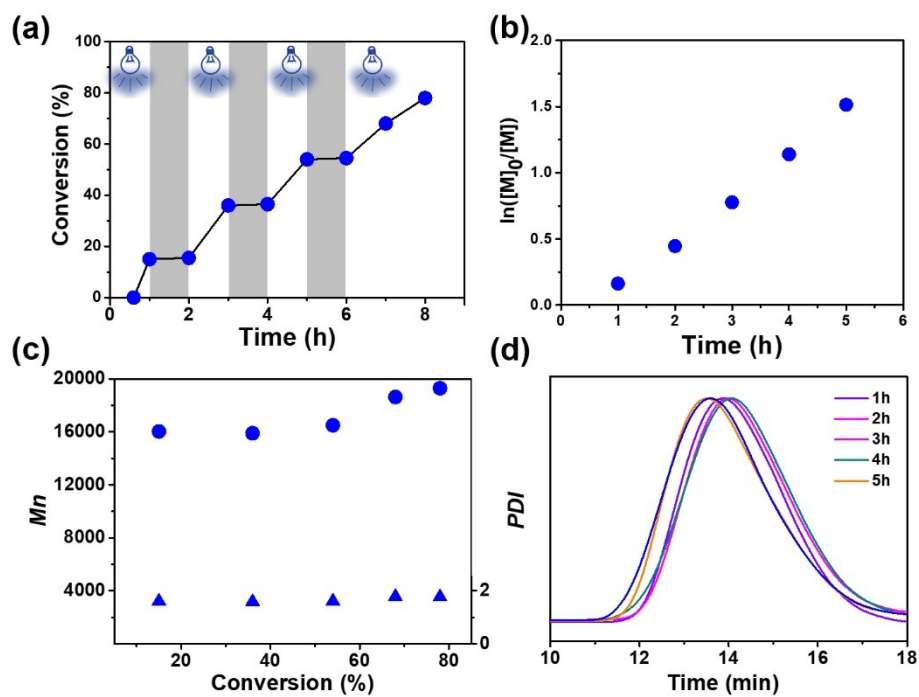

**Fig S10.** (a) Light on-off experiments and the plot of monomer conversion vs time (entry 7, Table 1). (b) Kinetic plot for the metal-free ATRP. (c) Plot of  $M_n$  and PDI vs monomer conversion for the polymerization of MMA under blue LEDs irradiation. (d) GPC traces of PMMA collected at different times.

Chemical shift (ppm)

**Fig S11.**  $^1\text{H}$  NMR spectrum of PMMA-*b*-PMMA.

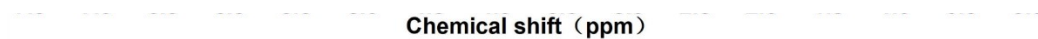

**Fig S12.**  $^1\text{H}$  NMR spectrum of PDMAEMA-*b*-PMMA.  $M_{n,\text{NMR}} = (1.31/2)/(1/3) \times 30 (\text{DP}_{\text{PMMA-Br}}) \times 157.21 \text{ g/mol} + 6000 \text{ g/mol}$  ( $M_{n,\text{PMMA-Br}} = 15000 \text{ g/mol}$ ).

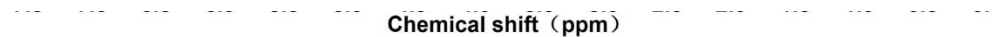

**Fig S13.**  $^1\text{H}$  NMR spectrum of PBzMA-*b*-PMMA.  $M_{n,\text{NMR}} = (1.54/2)/(1/3) \times 30 (\text{DP}_{\text{PMMA-Br}}) \times 176.21 \text{ g/mol} + 6000 \text{ g/mol}$  ( $M_{n,\text{PMMA-Br}} = 18000 \text{ g/mol}$ ).

Chemical shift (ppm)

**Fig S14.**  $^1\text{H}$  NMR spectrum of PtBA-*b*-PMMA.  $M_{n,\text{NMR}} = (6.80/9)/(1/3) \times 30 (\text{DP}_{\text{PMMA-Br}}) \times 128.17 \text{ g/mol} + 6000 \text{ g/mol}$  ( $M_{n,\text{PMMA-Br}} = 15000 \text{ g/mol}$ ).

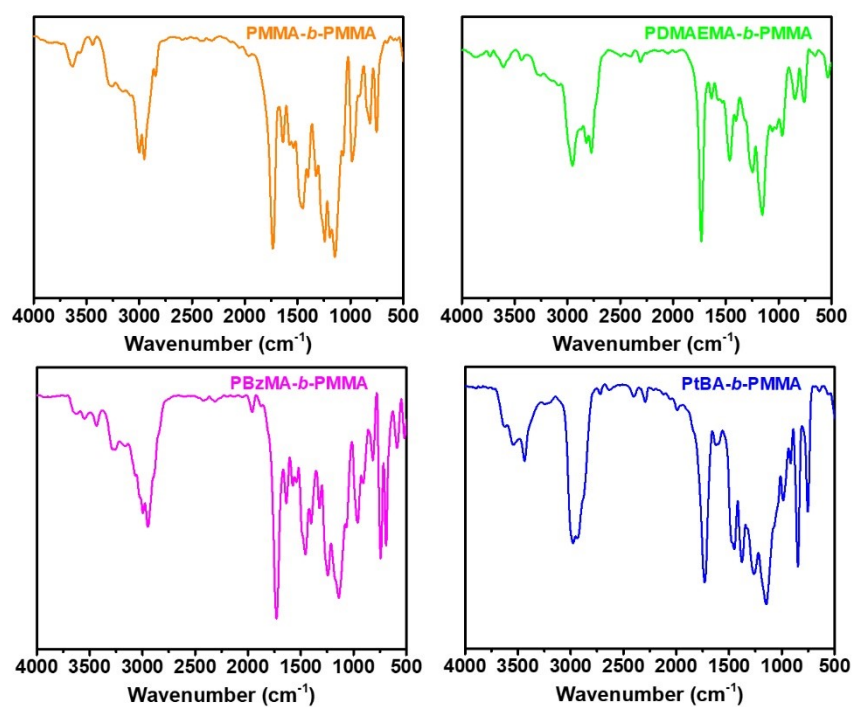

**Fig S15.** FT-IR spectra of PMMA-*b*-PMMA, PDMAEMA-*b*-PMMA, PBzMA-*b*-PMMA and PtBA-*b*-PMMA.

**Table S1. Results of the photo-ATRP using g-C<sub>3</sub>N<sub>4</sub> as photocatalyst<sup>a</sup>**

| Entry | [M]/[EBP] | Monomer | Catalyst                           | g-C <sub>3</sub> N <sub>4</sub><br>(g) | Solvent | t (h) | Conv.<br>(%) | $M_n$ ( $M_{n,theo}$ ) | PDI  |
|-------|-----------|---------|------------------------------------|----------------------------------------|---------|-------|--------------|------------------------|------|
| 1     | 200/1     | MMA     | g-C <sub>3</sub> N <sub>4</sub> -4 | 0.03                                   | THF     | 2     | 23           | 6000(5000)             | 1.40 |
| 2     | 200/1     | MMA     | g-C <sub>3</sub> N <sub>4</sub> -4 | 0.03                                   | THF     | 5     | 35           | 6000(7000)             | 1.41 |
| 3     | 200/1     | MMA     | g-C <sub>3</sub> N <sub>4</sub> -4 | 0.03                                   | THF     | 8     | 47           | 8000(9000)             | 1.65 |
| 4     | 200/1     | MMA     | g-C <sub>3</sub> N <sub>4</sub> -4 | 0.03                                   | THF     | 11    | 58           | 12000(12000)           | 1.64 |
| 5     | 200/1     | MMA     | g-C <sub>3</sub> N <sub>4</sub> -4 | 0.03                                   | THF     | 13    | 65           | 14000(13000)           | 1.69 |

<sup>a</sup>Polymerizations were performed using 1.5 g monomer and 1.5 g solvent under the irradiation of blue LEDs (12 W×2) (entry 10, Table 1). Conversion (Conv.) was determined gravimetrically.  $M_n$  and PDI were determined by GPC with polymethyl methacrylate (PMMA) standards.  $M_{n,theo}$  was calculated from monomer conversion.

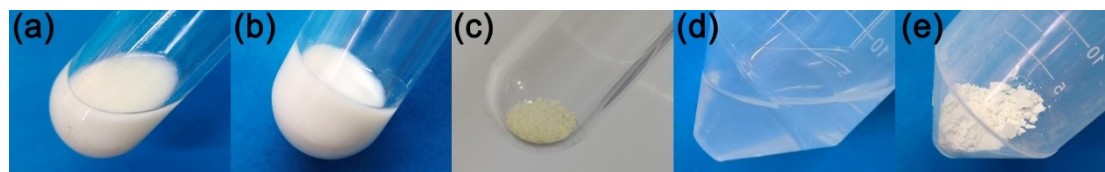

**Fig S16.** Digital image corresponding to Figure 7. (a) The sample before the polymerization. (b) The sample after the polymerization. (c) G-C<sub>3</sub>N<sub>4</sub>-4 separated from the solution after polymerization. (d) The separated polymer supernatant. (e) PMMA samples after drying.

Binding Energy (eV)

**Fig S17.** XPS spectra of g-C<sub>3</sub>N<sub>4</sub>-4 before the polymerization cycle and after the polymerization cycle.

## References

- (1) Zhou, Z.; Wang, J.; Yu, J.; Shen, Y.; Li, Y.; Liu, A.; Liu, S.; Zhang, Y. *J. Am. Chem. Soc.* **2015**, *137*, 2179-2182.
- (2) Su, Q.; Sun, J.; Wang, J.; Yang, Z.; Cheng, W.; Zhang, S. *Catal. Sci. Technol.* **2014**, *4*, 1556-1562.
- (3) Wang, Y.; Wang, X. C.; Antonietti, M. *Angew. Chem. Int. Ed.* **2012**, *51*, 68-89.
